1                           **A sporulation-independent way of life for *Bacillus thuringiensis***  
2                                           **in the late stages of an infection**

3  
4                           Hasna Toukabri, Didier Lereclus and Leyla Slamti\*

5  
6   Micalis Institute, INRAE, AgroParisTech, Université Paris-Saclay, 78350 Jouy-en-Josas,  
7   France

8  
9   \*Corresponding author: [leyla.slamti@inrae.fr](mailto:leyla.slamti@inrae.fr)

10  
11  
12  
13  
14  
15  
16  
17  
18  
19  
20  
21  
22  
23   The authors declare that there are no competing interests in relation to the work described.  
24

25 **ABSTRACT**

26 The formation of endospores has been considered as the unique mode of survival and  
27 transmission of sporulating Firmicutes due to the exceptional resistance and persistence of this  
28 bacterial form. However, the persistence of non-sporulated bacteria (Spo<sup>-</sup>) was reported during  
29 infection in *Bacillus thuringiensis*, an entomopathogenic sporulating Gram-positive bacterium.  
30 In this study, we investigated the behavior of a bacterial population in the late stages of an  
31 infection as well as the characteristics of the Spo<sup>-</sup> bacteria in the *B. thuringiensis/Galleria*  
32 *mellonella* infection model. Using fluorescent reporters coupled to flow cytometry as well as  
33 molecular markers, we demonstrated that the Spo<sup>-</sup> cells constitute about half of the population  
34 two weeks post-infection (pi) and that these bacteria present vitality signs. However, a protein  
35 synthesis and a growth recovery assay indicated that they are in a metabolically slowed-down  
36 state. Interestingly, they were extremely resistant to the cadaver environment which proved  
37 deadly for *in vitro*-grown vegetative cells and, strikingly, did not support spore germination. A  
38 transcriptomic analysis of this subpopulation at 7 days pi revealed a signature profile of this  
39 state. The expression analysis of individual genes at the cell level suggests that iron homeostasis  
40 is important at all stages of the infection, whereas the oxidative stress response seems of  
41 particular importance as the survival time increases. Altogether, these data show that non-  
42 sporulated bacteria are able to survive for a prolonged period of time and indicate that they  
43 engage in a profound adaptation process that leads to their persistence in the host cadaver.

## 44 INTRODUCTION

45 The ability of bacteria to face environmental fluctuations is essential to their survival. These  
46 stresses include nutrient limitation or depletion, variations of pH, temperature, oxygen level,  
47 osmolarity, radiation and chemical exposure. In conditions that do not support their growth,  
48 some Firmicutes, such as *Bacillus* species, have evolved the ultimate mode of resistance,  
49 sporulation [1]. This survival mode requires the activation of a specific and complex  
50 developmental pathway that leads to the formation of a spore, a highly resistant dormant cell  
51 that allows these species to survive in extreme conditions during extended periods [2–5].  
52 Due to their resistant nature, the formation of endospores was considered the unique mode of  
53 survival and transmission of these sporulating species. However, it was recently shown that a  
54 *Bacillus subtilis* sporulation mutant was able to survive deep starvation during several months  
55 by entering an oligotrophic state that supports extreme slow growth [6]. Moreover, spontaneous  
56 mutants in *spo0A*, the gene specifying the master regulator of sporulation [7,8], were isolated  
57 alongside spores after a month-long incubation of the food-borne pathogen *Bacillus cereus*  
58 under abiotic conditions in groundwater [9]. Furthermore, a *B. cereus* strain impaired in  
59 sporulation was shown to persist for several days on ready-to-eat vegetables and retained its  
60 ability to cause illness in a mammalian host [10]. In addition, it was shown that spores  
61 represented only 30% of the bacterial population that survived in an insect cadaver 4 days pi  
62 (dpi) with *Bacillus thuringiensis* and that a sporulation mutant was able to persist in the cadaver  
63 during that time [11].  
64 *B. thuringiensis* is an entomopathogenic bacterium that belongs to the *B. cereus sensu lato*  
65 group comprising several species that are pathogenic to humans and animals, notably *B. cereus*  
66 *sensu stricto*, which is responsible for foodborne toxi-infections as well as systemic infections,  
67 and *Bacillus anthracis*, the agent of anthrax [12]. *B. thuringiensis* was shown to carry out a full  
68 infectious cycle in the *Galleria mellonella* insect larvae model. This process is composed of

69 three major phases controlled by quorum-sensing systems [13]: virulence that allows the  
70 bacteria to invade and kill the host [14], necrotrophism which permits the bacteria to feed on  
71 the cadaver [11], and sporulation. These processes were reported in insects using fluorescent  
72 reporters to detect the activity of the regulators responsible for these states at the cell level [15].  
73 Sporulation was shown to only occur in a part of the subpopulation that had activated the  
74 necrotrophic regulon. This is due to the dual nature of the NprR regulator that acts as an  
75 activator of the necrotrophic regulon when bound to its cognate signaling peptide NprX, and as  
76 a phosphatase negatively regulating sporulation in its apo-form [16]. Necrotrophism was  
77 reported to be activated during the whole experiment time-span (*i.e.* 4 days) in bacteria that did  
78 not engage in sporulation. A category of cells, which did not express the necrotrophic or the  
79 sporulation reporters in the host, was identified and designated  $Nec^-/Spo^-$  [15,17]. Most of these  
80 bacteria were identified as viable using a cell death marker at 3 dpi and the results suggested  
81 that they were not in exponential or stationary phase [18], (and unpublished).  
82 In this study, we investigated the composition of the bacterial population during the late stages  
83 of an infection as well as the characteristics and the proportion of the non-sporulated bacterial  
84 population in the *B. thuringiensis/G. mellonella* infection model. We used an unstable  
85 fluorescent reporter coupled to flow cytometry to determine the actual duration of  
86 necrotrophism. We also examined the metabolic state of the  $Spo^-$  cells using protein synthesis  
87 and growth recovery assays on rich or insect-based medium. We performed a transcriptomic  
88 analysis of this subpopulation at 7 dpi that revealed a signature profile of this state.

89

## 90 **MATERIALS AND METHODS**

### 91 ***Bacterial strains and growth conditions***

92 The acrySTALLIFEROUS *Bacillus thuringiensis* 407  $Cry^-$  strain (*B. thuringiensis* 407 $^-$ ) [19] was used  
93 as the parental strain to create all the strains used in this study. *Escherichia coli* strain DH5 $\alpha$

94 [20] was used as the host strain for plasmid construction. *E. coli* strain ET12567 [21] was used  
95 to prepare DNA prior to electroporation in *B. thuringiensis*. Cells were grown under shaking at  
96 30°C or 37°C in LB medium (1% tryptone, 0.5% yeast extract, 1% NaCl) or HCT medium  
97 (0.7% casein hydrolysate, 0.5% tryptone, 0.68% KH<sub>2</sub>PO<sub>4</sub>, 0.012% MgSO<sub>4</sub>·7H<sub>2</sub>O, 0.00022%  
98 MnSO<sub>4</sub>·4H<sub>2</sub>O, 0.0014% ZnSO<sub>4</sub>·7H<sub>2</sub>O, 0.008% ferric ammonium citrate, 0.018%  
99 CaCl<sub>2</sub>·4H<sub>2</sub>O, pH 7.2). The bacteria were stored at -80°C in LB containing 15% glycerol.  
100 When required, the medium was supplemented with antibiotics at the following concentrations:  
101 100 µg/mL ampicillin (for *E. coli*), 200 µg/mL kanamycin, 10 µg/mL erythromycin (for  
102 *B. thuringiensis*).

103

#### 104 ***Plasmids and strains construction***

105 DNA manipulations are detailed in the supplemental material. All the plasmids, strains and  
106 oligonucleotide primers used in this study are listed in Tables S1, S2 and S3 in the supplemental  
107 material.

108

#### 109 ***Infection of Galleria mellonella***

110 Intrahemocoelic injection experiments with *Galleria mellonella* were carried out as described  
111 previously [14]. Briefly, last instar larvae were infected by intrahaemocoelic injections with  
112  $2 \cdot 10^4$  vegetative cells in exponential phase (OD<sub>600</sub>=1). Inocula were enumerated after plating  
113 onto LB agar medium. Infected larvae were incubated at 30°C under a Nikon CoolPix P1 on  
114 time-lapse photography mode and pictures were taken every 10 min to determine the time of  
115 death for each larva. Larvae that died within the same hour were used for each time point. A  
116 larva was considered dead at the time its movements stopped if followed by melanization ([see](#)  
117 [supplemental material for details, fig S1](#)).

118

119 ***Extraction of B. thuringiensis from G. mellonella cadavers***

120 Isolation of bacteria from insect cadavers was adapted from Verplaetse et al., 2015, [15].  
121 Cadavers were crushed with a 1 mL tip in a 1.5 mL Eppendorf tube. 1 mL of saline was added  
122 and the tube was vortexed. 750  $\mu$ L of the suspension were transferred to a new 1.5 mL tube and  
123 centrifuged for 45 sec at 13000 rpm. The pellet was resuspended in 750  $\mu$ L of saline and loaded  
124 in a 1 mL syringe fitted with a cotton filter in order to isolate bacterial cells from cadaver debris.  
125 The filtrate was then centrifuged for 30 sec at 13000 rpm, fixed in 4% formaldehyde in saline  
126 for 15 min, washed in saline, resuspended in GTE buffer [22] and kept at 4°C until flow  
127 cytometric or microscopy analysis.

128

129 ***Flow cytometric analysis***

130 Bacteria were diluted in filtered saline and fluorescent events were measured on a CyFlow  
131 Space cytometer (Sysmex Partec, France). Specifications of the apparatus and flow cytometric  
132 analyses are described in the supplemental material.

133

134 ***Microscopy***

135 Bacteria were observed with an AxioObserver.Z1 Zeiss inverted fluorescence microscope with  
136 a Zeiss AxioCam MRm digital camera and with Zeiss fluorescence filters. GFP, 5(6)-CFDA,  
137 DiBAC4(3), Sytox Green were imaged using the 38 HE filter (excitation: BP 470/40, beam  
138 splitter: FT 495, emission: 525/50) and mCherry was imaged using the 45 HE filter (excitation:  
139 BP 590/20, beam splitter: FT 605, emission: 620/14). Images were processed using the ZEN  
140 software package (Zeiss).

141

142 ***Sporulation assay***

143 The sporulated population was assessed by plating and by flow cytometry. Each larva cadaver

144 was ground in 3 mL of saline on ice using an T10 Ultra-Turaxx apparatus. The volume was then  
145 adjusted to 10 mL. To determine the number of total cells and the number of heat-resistant  
146 spores, the bacteria were enumerated by plating on LB agar plates following serial dilutions  
147 before and after heat treatment at 80°C for 12 min. For flow cytometry, fixed bacteria (as  
148 described above) harboring the red fluorescent sporulation reporter *PspoIIIQ-mCherry* were  
149 analyzed. Red fluorescent events were counted among the total cell count to calculate the  
150 percentage of sporulation.

151

### 152 ***Induction of gfp expression***

153 Bacteria were extracted from insect cadavers as described above or were harvested from HCT  
154 cultures at 30°C at OD<sub>600</sub>=1 (exponential phase of growth) and OD<sub>600</sub>=6 (stationary phase of  
155 growth) *via* centrifugation at 13000 rpm for 30 sec, washed once in saline and resuspended in  
156 conditioned HCT medium (obtained after filtration of a 10 h culture of *B. thuringiensis* 407<sup>-</sup> in  
157 HCT) to preserve bacteria while preventing cell growth. Half of the suspension was  
158 supplemented with xylose at 25 mM final concentration. For each sample, an aliquot was fixed  
159 as described above at the time of xylose addition and after 1 and 2 h of incubation with shaking  
160 at 30°C. The samples were kept at 4°C until flow cytometric or microscopy analysis.

161

### 162 ***Growth recovery assessment of the bacteria extracted from insect cadavers***

163 Culturability was assessed by plating the bacteria on two different media, LB agar and Insect  
164 agar, and by time-lapse microscopy. The bacteria were extracted from insect cadavers as  
165 described above or were harvested from *in vitro* cultures in LB at 30°C at OD<sub>600</sub>=1 (exponential  
166 phase), OD<sub>600</sub>=8 (stationary phase) and from a 48 h culture (composed of about 65% of spores)  
167 *via* centrifugation at 13000 rpm for 30 sec, washed once in saline, serial diluted and plated onto  
168 LB plates containing erythromycin. 16 hours after incubation at room temperature, colonies

169 were photographed with a Canon Eos 750D under a binocular stereo microscope Leica  
170 MZFLIII. Colony area was determined using the Image J software [23].

171 To prepare Insect agar plates, 12 larvae cadavers were harvested at 7 dpi and crushed in 50 mL  
172 saline then filtered as described above. Agar prepared in saline was then added at a final  
173 concentration of 1.5%. The bacteria extracted from insect larvae or harvested from LB cultures,  
174 in the same manner as above, were serial diluted and plated onto LB plates supplemented with  
175 erythromycin and Insect agar plates supplemented with erythromycin. Colonies were counted  
176 16 hours after incubation at room temperature for LB plates and after 4 days for Insect agar  
177 plates.

178 For time lapse microscopy, medium pads were prepared with LB supplemented with 1%  
179 agarose to fill a 125- $\mu$ l GeneFrame (Thermo Fisher Scientific, Waltham, MA, U.S.A.). After  
180 polymerization, 2-mm-wide strips were cut and three strips were placed in a new gene frame.  
181 Bacteria were extracted from insect larvae or harvested from LB cultures as described above  
182 and washed in saline. 2  $\mu$ L of cells were then pipetted onto the strips before the frame was  
183 sealed with a coverslip. *B. thuringiensis* development was monitored at 30°C in a temperature-  
184 controlled chamber with the microscope described above. Phase-contrast and fluorescence  
185 images were taken every hour for 5 h. Only bacteria extracted from insect cadavers at 0 h were  
186 assigned to a category (elongation, division, lysis, inactivity). Newly-formed daughter cells  
187 were excluded from the analysis.

188

### 189 ***Molecular dye staining***

190 Bacterial cells were harvested from LB cultures or insect cadavers as described above and  
191 resuspended in 1 mL of saline. Samples were diluted to  $10^7$  cells/mL in filtered saline  
192 supplemented or not with one of the dyes. 5(6)-CFDA (Biotium, Fremont, CA, USA),  
193 DiBAC4(3) (Sigma-Aldrich, Saint-Louis, MO, USA) and Sytox Green (Invitrogen, Eugene,



194 OR, USA) were suspended in DMSO and used at a final concentration of 5  $\mu$ M (5(6)-CFDA)  
195 or 0.5  $\mu$ M (DiBAC4(3) and Sytox Green). Cells were incubated at room temperature for 15  
196 min in the dark. Stained samples were washed once in saline before flow cytometric or  
197 microscopy analysis. Unstained and heat-shocked cells at 90°C for 15 min were used as control.  
198

### 199 ***RNA-Seq analysis***

200 RNA was extracted from shaken liquid cultures and from dead larvae at 7 dpi as  
201 described in the supplemental material. Nanodrop and Bioanalyzer instruments were used for  
202 quantity and quality controls ( $6,8 \leq \text{RINs} \leq 10$ ). Disrupting cells broke Spo<sup>-</sup> bacteria and left  
203 spores intact. Moreover, extraction of RNA from spore preparations using our protocol resulted  
204 in a very low yield of poor quality. However, we can not exclude a minute contamination with  
205 RNA from spores.

206 Library preparation including ribosomal RNA depletion (RiboZero) and sequencing was  
207 performed by the I2BC platform (Gif-sur-Yvette, France). Sequencing was conducted on an  
208 Illumina NextSeq machine using NextSeq 550/500 Mid Output Kit v2 to generate paired end  
209 reads (2x75).

210 Data processing was performed by the I2BC platform including the following steps:  
211 demultiplexing (with bcl2fastq2-2.18.12), adapter trimming (Cutadapt 1.15), quality control  
212 (FastQC v0.11.5), mapping (BWA v0.6.2-r126) against *B. thuringiensis* 407 strain. This  
213 generated between 9 M and 18 M of uniquely mapped reads per sample and counts for 6530  
214 genes. Differentially expressed genes (DEG) were determined using the R package “DESeq2”  
215 (v1.30.1) to estimate p-values and log<sub>2</sub> fold-changes. DEG with  $\text{padj} \leq 10^{-2}$  and  $\log_2\text{FC} \leq -2$  or  
216  $\log_2\text{FC} \geq 2$  were used for further analyses. Gene expression data are being deposited at the  
217 public repository Gene Expression Omnibus.

218 Using the functional re-annotation database available in the laboratory (see details in

219 supplemental materials) of the *B. thuringiensis* 407 genome (chromosome: INSDC  
220 CP003889.1, plasmids: INSDC CP003890.1 to CP003898.1), GO terms, COG letters and *B.*  
221 *subtilis* homologous genes were assigned to our data-set with Microsoft SQL server 2019. Venn  
222 Diagrams were constructed with Venny 2.1.0 [24], 2007-2015  
223 <https://bioinfogp.cnb.csic.es/tools/venny/index.html>). Using Subtiwiki [25], KEGG orthology  
224 database [26] and COG letters, we retrieved genes from these functional categories: oxidative  
225 stress, iron homeostasis, DNA recombination and repair, necrotrophism, sporulation, and  
226 germination (see supplemental material, table S4, S5, S6, for necrotrophism, sporulation and  
227 germination, respectively). Histograms and heatmaps of DEG according to these functional  
228 categories were then constructed using Prism 8 software (GraphPad).

229

### 230 ***Statistical analysis***

231 The data were analyzed using the Prism 8 software (GraphPad).

232 **RESULTS**

233 ***Non-sporulated bacteria survive in insect cadavers for at least 14 days post-infection***

234 A previous study recorded the sporulation rate of *B. thuringiensis* in insect larvae cadavers and  
235 showed that heat-resistant spores were detected 24 hpi and reached a plateau at 30% of the  
236 bacterial population from 48 hpi until the end of the experiment 4 dpi [11]. This result indicated  
237 that a large part of the bacterial population was able to survive for 4 days in these conditions  
238 without resorting to sporulation. In order to determine if the non-sporulating cells persisted  
239 during a longer period of time, and if the sporulation rate remained constant, we monitored the  
240 fate of the bacterial population during 14 days using two complementary methods. *B.*  
241 *thuringiensis* cells harboring *PspoIIQ'mcherry*, a transcriptional fusion between the promoter  
242 of *spoIIQ*, a sporulation gene activated when the cells are committed to sporulation [27], and  
243 the *B. thuringiensis*-optimized *mcherry* fluorescent reporter gene [15], were injected into  
244 *G. mellonella* larvae. Sporulation was then assayed by plating and by flow cytometry (as  
245 described in the Materials and Methods section). In our conditions, flow cytometry analysis of  
246 *PspoIIQ'mCherry* cannot discriminate between bacteria irreversibly engaged in sporulation and  
247 sporulated cells as the mCherry protein remains fluorescent in spores. In the plating assay, we  
248 cannot exclude that some spores will not be able to germinate and form colonies on LB agar  
249 plates. These two methods were therefore implemented to give the closest assessment of the  
250 sporulated and non-sporulated subpopulations. Larvae died between 8 to 12 hpi (fig S1) and  
251 bacteria were extracted from insect cadavers from 16 hpi to 14 dpi for analysis. The plating  
252 assay showed that the total number of CFU per larva remained stable during 14 dpi (fig S2).  
253 mCherry-positive bacteria (fig 1.a and 2.a) and heat-resistant spores (fig S2) were detected  
254 starting 1 dpi and represented about 40 and 50 % of the total population, respectively.  
255 Accordingly, microscopy results indicate that the mCherry-positive events mainly correspond  
256 to spores from the third day post-infection onwards (fig S2 and data not shown). The sporulation

257 rate remained stable during 14 days and was comprised between 30% and 55% indicating that  
258 up to 70% of the cells could be in a non-sporulated form. We cannot exclude that germination  
259 occurred in insect cadavers as a few spores had lost their refringence and remained fluorescent  
260 when observed by microscopy (data not shown). However less than 5% of the bacteria  
261 presented this profile (data not shown). Comparison of the data using a Bland-Altman plot (fig  
262 2.b) showed that the results obtained using both methods are similar. Indeed, the bias value is  
263 3.2 and the SD of bias 7.3, indicating that there is less than 10% difference in the sporulation  
264 percentage when comparing plating and flow cytometry. This indicates that both methods are  
265 equivalent for evaluating sporulation in these conditions. Taken together, these results show that  
266 sporulation is not the only survival strategy in insect cadavers even in late-infection stages.

267

### 268 ***Necrotrophism is a transient state occurring at early stages of survival in insect cadavers***

269 To assess the proportion of bacteria in the necrotrophic state during the late stages of infection  
270 in insect larvae, we monitored this state for 14 dpi using a transcriptional fusion between the  
271 promoter of *nprA*, an NprR-regulated gene [28], and the reporter gene *gfp<sub>BteAAV</sub>*, encoding an  
272 unstable Gfp [18]. This reporter gene was previously used to detect vegetative cells *in vivo* and  
273 showed its relevance as a molecular tool to assess transient gene expression during infection  
274 [18]. We associated this construct to the *PspoIIQ'mcherry* fusion. This combination of reporters  
275 allowed us to determine the fraction of the population that was able to persist in the late stages  
276 of infection without entering sporulation or activating the necrotrophism pathway.  
277 *G. mellonella* larvae were infected by intrahemocoelic injection with the Bt (pP*nprA'**gfp<sub>BteAAV</sub>*-  
278 *PspoIIQ'mCherry*) strain. Figure 2 shows that expression of the P*nprA'**gfp<sub>BteAAV</sub>* fusion started  
279 between 16 and 18 hpi with about 30% of the bacteria in the necrotrophic state (Nec<sup>+</sup>) at 18 hpi.  
280 The number of Nec<sup>+</sup> bacteria peaked at 20 hpi to near 60% and decreased to around 30% at 24  
281 hpi. Expression of the *PspoIIQ'mCherry* fusion started between 22 and 24 hpi with about 20%

282 of the bacteria expressing the sporulation reporter only (Spo<sup>+</sup>) and 15% of the population  
283 expressing both the necrotrophic and sporulation reporter (Nec<sup>+</sup>/Spo<sup>+</sup>). At 2 dpi the total number  
284 of Nec<sup>+</sup> and Nec<sup>+</sup>/Spo<sup>+</sup> bacteria decreased to about 10% of the population and remained at that  
285 level until the end of the experiment. These data show that necrotrophism is a transient state in  
286 which the bacteria remain during a limited period after the death of their host. Furthermore, our  
287 results reveal that the previously reported proportion of Nec<sup>-</sup>/Spo<sup>-</sup> cells was underestimated.

288

### 289 ***The majority of the non-sporulated late-infection stage bacteria present cellular vitality***

290 We analyzed the behavior and features of the Spo<sup>-</sup> bacteria during infection using molecular  
291 dyes to assess bacterial vitality. We used three commercial dyes to examine different vitality  
292 features of these bacteria: enzymatic activity by assessing esterase activity with 5(6)-CFDA (fig  
293 3.a), membrane potential with DiBAC4(3) (fig 3.b) and membrane integrity with Sytox Green  
294 (fig 3.c) [29]. Sytox Green staining was previously successfully used on cells extracted from  
295 insect cadavers to detect mortality among the 3 dpi non-necrotrophic cells [18]. Strain Bt  
296 (pPspoIIQ'mCherry) cultured in LB and harvested in exponential growth phase (Expo) and  
297 stationary growth phase (Stat), or extracted from insect cadavers at 1, 3 and 7 dpi, was incubated  
298 with the molecular dyes listed above. Cells were then analyzed by flow cytometry (fig 3) and  
299 microscopy (fig S4) to quantify the stained Spo<sup>-</sup> cells. The results show that 5(6)-CFDA stained  
300 90% of Expo and Stat cells, and 67% to 72% of insect cadavers cells (fig 3). However, this  
301 difference was not statistically significant. Less than 16% of Expo and Stat cells and  
302 approximately 30% of insect cadavers cells were marked with DiBAC4(3) and Sytox Green  
303 (fig 3.b and 3.c). Bacteria extracted from insect cadavers presented a more heterogeneous  
304 profile as the percentage of marked cells ranged from 15% to 60% of the Spo<sup>-</sup> bacteria. Our  
305 results indicate that a portion of the Spo<sup>-</sup> cells extracted from insect cadavers was damaged, but  
306 the majority of these bacteria presented esterase activity, membrane polarization and membrane

307 integrity, indicating cellular vitality.

308

309 ***Protein production induction is delayed in non-sporulated late-infection stage bacteria***

310 To further assess the physiological state of the 7 dpi bacteria, we examined the metabolic  
311 activity of these cells by recording their protein synthesis ability. We designed a strain harboring  
312 the transcriptional fusion  $Px'gfp_{Bte}$  between a xylose-inducible promoter and a Gfp-encoding  
313 reporter gene associated to the sporulation reporter  $PspoIIQ'mCherry$ . We assessed the ability  
314 of the  $Spo^-$  cells to synthesize proteins by incubating them in conditioned HCT medium (HCTc)  
315 supplemented with xylose for 1 and 2 h and measuring the proportion of GFP-positive and  
316 mCherry-negative bacteria using flow cytometry (fig 4) coupled to microscopy observations  
317 (fig S5). Expo cells and Stat cells harvested from HCT cultures at 30°C, as well as bacteria  
318 extracted from insect cadavers at different time points (1, 3 and 7 dpi) were subjected to this  
319 treatment. The results show that at the start of induction, almost no bacteria expressed the  
320  $Px'gfp_{Bte}$  fusion in any of the samples, except for about 6% of the Stat and 1 dpi cells (fig 4).  
321 However, approximately 70% of the  $Spo^-$  Expo, Stat, 1 and 3 dpi cells, synthesized Gfp at 1 h  
322 post-induction. At 2 h post-induction the proportion of bacteria expressing  $gfp_{Bte}$  in these  
323 samples slightly increased to 80%. Interestingly, the 7 dpi bacteria presented a different  
324 induction profile. At 1 h post-induction, less than 15% of the  $Spo^-$  bacteria were fluorescent,  
325 whereas at 2 h post-induction 15% to 75% of these cells were able to produce Gfp. This result  
326 indicates that the 7 dpi bacteria retain their ability to synthesize proteins, albeit with a greater  
327 time delay and variability between samples than for the other bacterial conditions assayed. This  
328 indicates that non-sporulating bacteria undergo physiological changes during the late infection  
329 stages suggestive of a metabolic slow-down.

330

331 ***Growth recovery of late-infection stage bacteria is impaired on rich medium, in contrast to***

332 ***insect medium***

333 We performed a colony-size assay to determine whether bacteria extracted at late time points  
334 from insect cadavers were able to replicate when exposed to fresh growth medium. Expo cells,  
335 Stat cells, spores harvested from 48 h-LB cultures at 30°C and bacteria extracted from insect  
336 cadavers at 1, 3 and 7 dpi were plated onto LB agar. Plates were photographed after 16 hours  
337 of incubation at room temperature (fig 5.a) and colony size was determined as described in the  
338 Materials and Methods section. The results show that colonies resulting from 3 and 7 dpi  
339 bacteria, as well as *in vitro*-prepared spores, were smaller than those resulting from Expo, Stat  
340 and 1 dpi cells (fig 5.a). This indicates that late-infection stage bacteria recover slower than  
341 bacteria sampled at an earlier infection stage or than *in vitro*-grown bacteria. This recovery is  
342 similar to that of *in vitro*-generated spores. The results might reflect a delay of growth due to  
343 the germination of the spores present at 3 dpi or after. However, all the colonies were smaller  
344 and therefore include the Spo<sup>-</sup> cells, unless they are unable to form a colony. After longer  
345 incubation times, all the samples displayed similar colony-size (data not shown). In order to  
346 determine more precisely the behavior of the bacterial subpopulations, we also examined the  
347 growth of 7 dpi bacteria at the single cell level using time-lapse microscopy. Expo, Stat and 7  
348 dpi bacteria were inoculated on LB agarose strips at 30°C and the behavior of Spo<sup>-</sup> cells was  
349 followed during 5 hours (fig 5.c and 5.d). About 8 to 16% of the inoculated bacteria lysed  
350 regardless of the sample. Approximately 80% of Expo and Stat cells were able to divide whereas  
351 the majority of 7 dpi cells were inactive (fig 5.b). We observed elongation and growth for less  
352 than 20% of the 7 dpi bacteria (fig 5.c). These results show that 7 dpi bacteria rarely divided  
353 over a 5 h-time-lapse experiment which is in agreement with the slower growth recovery  
354 phenotype observed on LB plates.

355 In order to determine if the late-infection stage bacteria were better adapted to a medium closer  
356 to the insect cadaver environment, we performed a recovery assay on an Insect agar medium

357 prepared as described in the Materials and Methods section. Expo cells, Stat cells, spores  
358 harvested from 48 h-LB cultures at 30°C and bacteria extracted from insect cadavers at 1, 3 and  
359 7 dpi were plated onto Insect agar plates. [Figure 5.d](#) shows that there is a drastic drop in the  
360 numbers of CFU/mL resulting from the plating of Expo and Stat cells, as well as spores, on  
361 Insect agar compared to LB. Less than 0.3% of these bacteria survived on this medium. About  
362 6% of the 1 dpi population was able to grow on this medium compared to LB. In sharp contrast,  
363 the number of CFU/mL for 3 and 7 dpi cells was similar on both media. Taken together, these  
364 results suggest that the insect cadaver is a hostile environment for bacteria and that adaptation  
365 is required to survive in these conditions.

366

### 367 ***Transcriptomic profile of late-infection *B. thuringiensis****

368 To determine the expression profile of the Spo<sup>-</sup>/Nec<sup>-</sup> cells and begin to understand how these  
369 bacteria persist in the cadavers, we performed a global *in vivo* transcriptional analysis at a late  
370 stage of infection using an RNA-Sequencing approach. We chose to extract RNA from the total  
371 population at the 7 dpi time-point that presented very few Nec<sup>+</sup> bacteria ([fig 2](#)) and we verified  
372 that RNA was only poorly extracted from spores, thus preventing a bias in our analysis (see  
373 Materials and Methods section). We compared the transcriptome of 7 dpi bacteria to Expo and  
374 Stat bacteria grown in LB medium. The transcriptome of the Stat and Expo bacteria grown in  
375 LB medium was also compared to identify genes differentially expressed in the insect  
376 specifically. As presented in [fig 6.a](#), the principal component analysis shows that the 7 dpi  
377 bacteria differed substantially from both Expo and Stat cells, indicating that these cells are in a  
378 different state. The results show that 484 and 203 genes were specifically up-regulated and  
379 down-regulated, respectively, in the 7 dpi cells when compared to both Expo and Stat bacteria  
380 ([fig 6.b](#)). We found that most of the genes belonging to the NprR regulon were down-regulated  
381 when compared to Stat cells but up-regulated when compared to Expo cells ([Table S4](#)). This is



382 in accordance with the fact that a small proportion of bacteria are Nec<sup>+</sup> at 7 dpi (fig 1) while  
383 necrotrophism is repressed in exponential phase and activated during stationary phase *in vitro*  
384 [28]. The data also show that most sporulation and germination genes were not differentially  
385 expressed, indicating that these two processes were not triggered in the subpopulation of interest  
386 (Table S5, S6).

387 Most of the up-regulated genes in the 7 dpi cells are involved in inorganic ion transport and  
388 metabolism, transcription, replication, recombination and repair, whereas the down-regulated  
389 genes are mostly involved in cell motility, signal transduction mechanisms and cell  
390 wall/membrane/envelope biogenesis (fig 6.c), the latter indicating a decrease in the growth  
391 process. More than 300 differentially expressed genes were assigned to an unknown function.  
392 Differentially expressed genes with the highest or lowest log<sub>2</sub>FC values were found in the  
393 oxidative stress, iron homeostasis, DNA replication, recombination and repair and cell motility  
394 categories (fig 6.d). Interestingly, all motility genes were down, all iron homeostasis genes were  
395 up, and all oxidative stress genes were up (except for one), indicating that these mechanisms  
396 are key for late infection stage survival.

397

398 ***Oxidative stress genes are specifically expressed during late-infection, in contrast to iron***  
399 ***homeostasis genes expressed at all times***

400 To examine the expression profile of selected genes identified in the RNA-Seq analysis and  
401 determine which of these were specific to late infection stage survival, we constructed strains  
402 harboring a transcriptional fusion between the promoter region of the gene of interest and the  
403 *gfp<sub>BteAAV</sub>* reporter gene, associated to the sporulation reporter *PspoIIQ-mCherry*. We chose  
404 genes with the highest log<sub>2</sub>FC values obtained by the differential gene expression analysis in  
405 the iron homeostasis and oxidative stress resistance categories. We followed the expression  
406 profile of representative genes from these categories such as *ykun2* (a flavodoxin that replaces

407 ferredoxin under conditions of iron limitation), *isdE1* (involved in heme scavenging), *dhbA* (the  
408 first gene of the *dhb* operon that specifies the biosynthesis of the siderophore bacillibactin  
409 involved in the chelation of ferric iron from the surrounding environment), *BTB\_c10430*  
410 (annotated as *sigX* by KEGG orthology), *katE1* (a catalase and general stress protein) and *sodA1*  
411 (a superoxide dismutase and general stress protein) [26]. *Pykun2'gfp<sub>BteAAV</sub>* and  
412 *PisdE1'gfp<sub>BteAAV</sub>* were expressed from the start of the infection, and the percentage of  
413 fluorescent cells among the Spo<sup>-</sup> cells was around 30% (fig 7.a and 7.b). Similarly,  
414 *PdhbA'gfp<sub>BteAAV</sub>* was expressed in approximately 40% of the cells among the Spo<sup>-</sup> bacteria in  
415 the 1, 3 and 7 dpi samples (fig 7.c). For the reporter *PBTB\_c10430'gfp<sub>BteAAV</sub>* less than 20% of  
416 the 1 and 3 dpi Spo<sup>-</sup> cells were Gfp-positive. At 7 dpi, around 40% of the Spo<sup>-</sup> cells produced  
417 Gfp, indicating a specific activation of *BTB\_c10430* during in late infection survival (fig 7.d).  
418 *PkatE1'gfp<sub>BteAAV</sub>* and *PsodA1'gfp<sub>BteAAV</sub>* were specifically expressed in 7 dpi cells with about  
419 65% of green fluorescent Spo<sup>-</sup> cells for the former and 80% for the latter (fig 7.c). As expected,  
420 none of these reporters were expressed in Expo and Stat cells. Altogether, these results indicate  
421 that iron homeostasis is important from the start of the infection whereas an oxidative stress  
422 response is mounted as the bacteria spend more time in the cadaver environment.

423

## 424 **DISCUSSION**

425 Our study reports the characterization of a physiological state that procures the sporulating  
426 entomopathogenic Gram-positive bacterium *B. thuringiensis* specific properties allowing its  
427 persistence in the host environment in a non-sporulated form. We analyzed the phenotypic  
428 properties and transcription profile of the Spo<sup>-</sup> *B. thuringiensis* cells in the context of an  
429 infection in *G. mellonella* larvae. These larvae are natural hosts for the *B. thuringiensis* species,  
430 but they are also widely used as an alternative to mammalian models of infection to study  
431 bacterial virulence and host colonization [30,31].

432 The RNA-Seq analysis showed that the motility genes were down-regulated in 7 dpi bacteria  
433 compared to *in-vitro*-grown cells, and that the motility repressor-encoding gene *mogR* [32] was  
434 up-regulated in 7 dpi bacteria compared to exponentially growing cells. Similarly, the biofilm-  
435 associated genes *calY*, *tasA* and the *eps2* locus [33,34], were up-regulated compared to  
436 exponentially growing cells. These data suggest that the late-infection stage bacteria form a  
437 biofilm which might confer them an advantage for long-term survival considering the resistance  
438 properties of these structures [35]. The most represented categories among the up-regulated  
439 transcripts in 7 dpi bacteria compared to *in vitro*-grown cells are the oxidative stress response,  
440 DNA recombination, replication and repair in addition to iron homeostasis. The expression of  
441 uptake systems for iron, as well as biosynthesis and uptake of the endogenous siderophore  
442 bacillibactin was shown to be activated by iron limitation in *B. cereus* [36]. During an infection,  
443 the host is considered to be an iron-depleted environment and bacteria need to deploy strategies  
444 to scavenge this element, such as the activation of the Fur regulon [37,38]. This is consistent  
445 with the activation of the iron homeostasis genes *dhbA* and *isdE1*, belonging to this regulon,  
446 during all stages of the infection. Iron is essential for the function of various proteins and iron  
447 homeostasis was previously reported as being important for *B. cereus* pathogenesis in the first  
448 stages of *G. mellonella* infection by oral gavage [39]. However, this metal is also a potential  
449 hazard in combination with compounds such as H<sub>2</sub>O<sub>2</sub> because the reaction between the two  
450 products generates reactive oxygen species (ROS) that can be harmful by damaging cellular  
451 components such as DNA or proteins with [Fe-S] clusters [40]. Several studies have linked iron  
452 homeostasis and DNA repair to a response to oxidative stress and showed the upregulation of  
453 these gene categories upon H<sub>2</sub>O<sub>2</sub> exposure [41,42], and it was recently reported that H<sub>2</sub>O<sub>2</sub> was  
454 produced in the hemolymph of *G. mellonella* during *Salmonella enterica* infection [43].  
455 Moreover, the melanization defense reaction that occurs after the insect infection liberates ROS  
456 and might last for several days [44–46]. Aerobic metabolism also generates endogenous

457 oxidative stress if O<sub>2</sub> is not completely reduced during respiration and a secondary oxydative  
458 stress response can also be triggered when *Bacillus* encounter unfavorable conditions in an  
459 aerobic environment [47]. All these stresses are counteracted by the action of proteins such as  
460 catalases (Kat), superoxide dismutases (SodA) or DNA-binding ferroxidases (Dps) [48,49], all  
461 of which are overexpressed in 7 dpi bacteria. RNA-Seq analysis also revealed that the  
462 BTB\_c10430 locus, annotated as encoding the SigX protein [26], is specifically up-regulated  
463 in 7 dpi bacteria. SigX belongs to the extracytoplasmic function (ECF) sigma factor family that  
464 helps maintain cell envelope homeostasis and activate resistance to agents that can compromise  
465 the integrity of the envelope, the first defense against environmental threats [50]. A *B. subtilis*  
466 *sigX* deletion mutant was shown to be sensitive to oxidative stress [51] . Further investigations  
467 should examine the involvement of this regulatory protein in the maintenance of  
468 *B. thuringiensis* in insect cadavers. It would also be informative to determine if the oxidative  
469 stress response triggered in the late-infection stage bacteria is due to the cadaver environment,  
470 to an excessive iron uptake or to a combination of the two and to understand the role of the  
471 oxidative stress response in the resistance of *B. thuringiensis* during long-term infection.  
472 *B. thuringiensis* is able to overcome the immune defenses of *G. mellonella*, to multiply and to  
473 completely invade its host in less than 24 hpi [11,52,53], (this study and unpublished). It was  
474 shown that the bacteria engage in necrotrophism after the death of the larva by activating the  
475 NprR regulon that includes genes encoding chitinases, proteases and oligopeptide permeases  
476 [11,15]. Activation of this regulon seemed to last throughout the duration of the infection [15]  
477 and an *nprR* deletion mutant was unable to survive in the cadaver suggesting that the regulon  
478 was required for long-term survival. However, we showed here that necrotrophism is a transient  
479 state limited to the first stages of survival in the cadaver. We propose that this state allows *B.*  
480 *thuringiensis* to scavenge the nutrients present in the cadaver shortly after the insect death, then  
481 the bacteria enter different pathways, potentially triggered by a stress signal such as nutrient

482 depletion, that allow for their persistence in the host. A subpopulation enters the differentiation  
483 pathway leading to sporulation, while another engages in a metabolic slow-down that  
484 accentuates with the increase of exposure time to the cadaver environment. This subpopulation  
485 also showed resistance to the cadaver environment which proved hostile for *in vitro*-grown  
486 bacteria as well as *in-vitro* generated spores.  
487 Altogether, these results show that non-sporulated late-infection stage *B. thuringiensis* are  
488 resilient cells able to resist in a harsh environment and suggest that this adaptation relies mainly  
489 on the activation of stress resistance genes as well as entering a metabolic slow-down. The  
490 fitness advantages conferred by the phenotypic heterogeneity of the *B. thuringiensis* population  
491 during infection and, in particular, by the co-existence of spores and of the non-sporulated form  
492 able to survive for a prolonged period in a host cadaver, still need to be elucidated. Studying  
493 the mechanisms that govern this state will provide valuable fundamental knowledge about the  
494 lifecycle of these bacteria and might lead to the development of new strategies to combat  
495 sporulating pathogenic species.

496

#### 497 **CONFLICT OF INTEREST STATEMENT**

498 The authors declare that the research was conducted in the absence of any commercial or  
499 financial relationships that could be construed as a potential conflict of interest.

500

#### 501 **ACKNOWLEDGEMENTS**

502 The authors are indebted to Christophe Buisson for insect rearing. This work has benefited from  
503 the facilities and expertise of the high throughput sequencing core facility of I2BC (Centre de  
504 Recherche de Gif – <http://www.i2bc.paris-saclay.fr/>) and the authors thank Delphine Naquin for  
505 primary analysis. We are grateful to Tarek Toukabri, Agnès Réjasse and Sébastien Gélis-  
506 Jeanvoine and Yan Jaszczyszyn for their help with the RNA-Seq experiment and analysis. The

507 CyFlow Space flow cytometer was funded by the DIM Astrea (French regional program Ast11  
508 0137). HT was the recipient of a doctoral grant from the ministry of French higher education,  
509 delivered by the Doctoral School ABIES at AgroParisTech–Université Paris Saclay. This work  
510 was supported by the MICA department of INRAE (French National Research Institute for  
511 Agriculture, Food and Environment).

512

## 513 REFERENCES

- 514 [1] Galperin MY. Genome Diversity of Spore-Forming Firmicutes. *Microbiol Spectr* 2013;1.  
515 <https://doi.org/10.1128/microbiolspectrum.TBS-0015-2012>.
- 516 [2] Hilbert DW, Piggot PJ. Compartmentalization of Gene Expression during *Bacillus subtilis*  
517 Spore Formation. *Microbiol Mol Biol Rev* 2004;68:234–62.  
518 <https://doi.org/10.1128/MMBR.68.2.234-262.2004>.
- 519 [3] Setlow P. Spore Resistance Properties. *Microbiol Spectr* 2014;2:2.5.11.  
520 <https://doi.org/10.1128/microbiolspec.TBS-0003-2012>.
- 521 [4] Horneck G, Bücker H, Reitz G. Long-term survival of bacterial spores in space. *Advances*  
522 *in Space Research* 1994;14:41–5. [https://doi.org/10.1016/0273-1177\(94\)90448-0](https://doi.org/10.1016/0273-1177(94)90448-0).
- 523 [5] Stragier P, Losick R. Cascades of sigma factors revisited. *Mol Microbiol* 1990;4:1801–6.  
524 <https://doi.org/10.1111/j.1365-2958.1990.tb02028.x>.
- 525 [6] Gray DA, Dugar G, Gamba P, Strahl H, Jonker MJ, Hamoen LW. Extreme slow growth as  
526 alternative strategy to survive deep starvation in bacteria. *Nat Commun* 2019;10:890.  
527 <https://doi.org/10.1038/s41467-019-08719-8>.
- 528 [7] Piggot PJ, Coote JG. Genetic aspects of bacterial endospore formation. *Bacteriol Rev*  
529 1976;40:908–62. <https://doi.org/10.1128/br.40.4.908-962.1976>.
- 530 [8] Molle V, Fujita M, Jensen ST, Eichenberger P, González-Pastor JE, Liu JS, et al. The  
531 Spo0A regulon of *Bacillus subtilis*: The Spo0A regulon. *Molecular Microbiology*

- 532 2003;50:1683–701. <https://doi.org/10.1046/j.1365-2958.2003.03818.x>.
- 533 [9] Rousset L, Alpha-Bazin B, Château A, Armengaud J, Clavel T, Berge O, et al.  
534 Groundwater promotes emergence of asporogenic mutants of emetic *BACILLUS CEREUS* .  
535 Environ Microbiol 2020;22:5248–64. <https://doi.org/10.1111/1462-2920.15203>.
- 536 [10] Antequera-Gómez ML, Díaz-Martínez L, Guadix JA, Sánchez-Tévar AM, Sopenña-Torres  
537 S, Hierrezuelo J, et al. Sporulation is dispensable for the vegetable-associated life cycle of  
538 the human pathogen *Bacillus cereus*. Microb Biotechnol 2021;14:1550–65.  
539 <https://doi.org/10.1111/1751-7915.13816>.
- 540 [11] Dubois T, Faegri K, Gélis-Jeanvoine S, Perchat S, Lemy C, Buisson C, et al. Correction:  
541 Necrotrophism Is a Quorum-Sensing-Regulated Lifestyle in *Bacillus thuringiensis*. PLoS  
542 Pathog 2016;12:e1006049. <https://doi.org/10.1371/journal.ppat.1006049>.
- 543 [12] Ehling-Schulz M, Lereclus D, Koehler TM. The *Bacillus cereus* Group: *Bacillus* Species  
544 with Pathogenic Potential. Microbiol Spectr 2019;7.  
545 <https://doi.org/10.1128/microbiolspec.GPP3-0032-2018>.
- 546 [13] Slamti L, Perchat S, Huillet E, Lereclus D. Quorum Sensing in *Bacillus thuringiensis* Is  
547 Required for Completion of a Full Infectious Cycle in the Insect. Toxins 2014;6:2239–55.  
548 <https://doi.org/10.3390/toxins6082239>.
- 549 [14] Salamitou S, Ramisse F, Brehélin M, Bourguet D, Gilois N, Gominet M, et al. The plcR  
550 regulon is involved in the opportunistic properties of *Bacillus thuringiensis* and *Bacillus*  
551 *cereus* in mice and insects. Microbiology 2000;146:2825–32.  
552 <https://doi.org/10.1099/00221287-146-11-2825>.
- 553 [15] Verplaetse E, Slamti L, Gohar M, Lereclus D. Cell Differentiation in a *Bacillus*  
554 *thuringiensis* Population during Planktonic Growth, Biofilm Formation, and Host  
555 Infection. MBio 2015;6:e00138-15. <https://doi.org/10.1128/mBio.00138-15>.
- 556 [16] Perchat S, Talagas A, Poncet S, Lazar N, Li de la Sierra-Gallay I, Gohar M, et al. How

- 557 Quorum Sensing Connects Sporulation to Necrotrophism in *Bacillus thuringiensis*. PLoS  
558 Pathog 2016;12:e1005779. <https://doi.org/10.1371/journal.ppat.1005779>.
- 559 [17] Verplaetse E, Slamti L, Gohar M, Lereclus D. Two distinct pathways lead *Bacillus*  
560 *thuringiensis* to commit to sporulation in biofilm. Res Microbiol 2017;168:388–93.  
561 <https://doi.org/10.1016/j.resmic.2016.03.006>.
- 562 [18] Ben Rejeb S, Lereclus D, Slamti L. Analysis of *abrB* Expression during the Infectious  
563 Cycle of *Bacillus thuringiensis* Reveals Population Heterogeneity. Front Microbiol  
564 2017;8:2471. <https://doi.org/10.3389/fmicb.2017.02471>.
- 565 [19] Lereclus D. Transformation and expression of a cloned  $\delta$ -endotoxin gene in *Bacillus*  
566 *thuringiensis*. FEMS Microbiology Letters 1989;60:211–7. [https://doi.org/10.1016/0378-](https://doi.org/10.1016/0378-1097(89)90511-9)  
567 [1097\(89\)90511-9](https://doi.org/10.1016/0378-1097(89)90511-9).
- 568 [20] Taylor RG, Walker DC, McInnes RR. *E. coli* host strains significantly affect the quality of  
569 small scale plasmid DNA preparations used for sequencing. Nucl Acids Res  
570 1993;21:1677–8. <https://doi.org/10.1093/nar/21.7.1677>.
- 571 [21] MacNeil DJ, Gewain KM, Ruby CL, Dezeny G, Gibbons PH, MacNeil T. Analysis of  
572 *Streptomyces avermitilis* genes required for avermectin biosynthesis utilizing a novel  
573 integration vector. Gene 1992;111:61–8. [https://doi.org/10.1016/0378-1119\(92\)90603-M](https://doi.org/10.1016/0378-1119(92)90603-M).
- 574 [22] Vlamakis H, Aguilar C, Losick R, Kolter R. Control of cell fate by the formation of an  
575 architecturally complex bacterial community. Genes Dev 2008;22:945–53.  
576 <https://doi.org/10.1101/gad.1645008>.
- 577 [23] Schneider CA, Rasband WS, Eliceiri KW. NIH Image to ImageJ: 25 years of image  
578 analysis. Nat Methods 2012;9:671–5. <https://doi.org/10.1038/nmeth.2089>.
- 579 [24] Oliveros JC. An interactive tool for comparing lists with Venn’s diagrams. Venny 21 2007.  
580 <https://bioinfogp.cnb.csic.es/tools/venny/index.html> (accessed April 16, 2022).
- 581 [25] Pedreira T, Elfmann C, Stülke J. The current state of SubtiWiki, the database for the model



- 582 organism *Bacillus subtilis*. *Nucleic Acids Res* 2022;50:D875–82.  
583 <https://doi.org/10.1093/nar/gkab943>.
- 584 [26] Kanehisa M, Sato Y, Kawashima M, Furumichi M, Tanabe M. KEGG as a reference  
585 resource for gene and protein annotation. *Nucleic Acids Res* 2016;44:D457-462.  
586 <https://doi.org/10.1093/nar/gkv1070>.
- 587 [27] Londoño-Vallejo JA, Fréhel C, Stragier P. SpoIIQ, a forespore-expressed gene required  
588 for engulfment in *Bacillus subtilis*. *Mol Microbiol* 1997;24:29–39.  
589 <https://doi.org/10.1046/j.1365-2958.1997.3181680.x>.
- 590 [28] Perchat S, Dubois T, Zouhir S, Gominet M, Poncet S, Lemy C, et al. A cell-cell  
591 communication system regulates protease production during sporulation in bacteria of the  
592 *Bacillus cereus* group. *Mol Microbiol* 2011;82:619–33. <https://doi.org/10.1111/j.1365-2958.2011.07839.x>.
- 594 [29] Kumar SS, Ghosh AR. Assessment of bacterial viability: a comprehensive review on  
595 recent advances and challenges. *Microbiology (Reading)* 2019;165:593–610.  
596 <https://doi.org/10.1099/mic.0.000786>.
- 597 [30] Tsai CJ-Y, Loh JMS, Proft T. *Galleria mellonella* infection models for the study of bacterial  
598 diseases and for antimicrobial drug testing. *Virulence* 2016;7:214–29.  
599 <https://doi.org/10.1080/21505594.2015.1135289>.
- 600 [31] Fedhila S, Buisson C, Dussurget O, Serror P, Glomski IJ, Liehl P, et al. Comparative  
601 analysis of the virulence of invertebrate and mammalian pathogenic bacteria in the oral  
602 insect infection model *Galleria mellonella*. *J Invertebr Pathol* 2010;103:24–9.  
603 <https://doi.org/10.1016/j.jip.2009.09.005>.
- 604 [32] Smith V, Josefsen M, Lindbäck T, Hegna IK, Finke S, Tourasse NJ, et al. MogR Is a  
605 Ubiquitous Transcriptional Repressor Affecting Motility, Biofilm Formation and  
606 Virulence in *Bacillus thuringiensis*. *Front Microbiol* 2020;11:610650.

- 607 <https://doi.org/10.3389/fmicb.2020.610650>.
- 608 [33] Candela T, Fagerlund A, Buisson C, Gilois N, Kolstø A-B, Økstad OA, et al. CalY is a  
609 major virulence factor and a biofilm matrix protein. *Mol Microbiol* 2019;111:1416–29.  
610 <https://doi.org/10.1111/mmi.14184>.
- 611 [34] Caro-Astorga J, Frenzel E, Perkins JR, Álvarez-Mena A, de Vicente A, Ranea JAG, et al.  
612 Biofilm formation displays intrinsic offensive and defensive features of *Bacillus cereus*.  
613 *NPJ Biofilms Microbiomes* 2020;6:3. <https://doi.org/10.1038/s41522-019-0112-7>.
- 614 [35] Lin Y, Briandet R, Kovács ÁT. *Bacillus cereus* sensu lato biofilm formation and its  
615 ecological importance. *Biofilm* 2022;4:100070.  
616 <https://doi.org/10.1016/j.bioflm.2022.100070>.
- 617 [36] Hayrapetyan H, Siezen R, Abee T, Nierop Groot M. Comparative Genomics of Iron-  
618 Transporting Systems in *Bacillus cereus* Strains and Impact of Iron Sources on Growth  
619 and Biofilm Formation. *Front Microbiol* 2016;7:842.  
620 <https://doi.org/10.3389/fmicb.2016.00842>.
- 621 [37] Fedhila S, Daou N, Lereclus D, Nielsen-LeRoux C. Identification of *Bacillus cereus*  
622 internalin and other candidate virulence genes specifically induced during oral infection  
623 in insects: *Bacillus cereus* internalin. *Molecular Microbiology* 2006;62:339–55.  
624 <https://doi.org/10.1111/j.1365-2958.2006.05362.x>.
- 625 [38] Daou N, Buisson C, Gohar M, Vidic J, Bierne H, Kallassy M, et al. IIsA, a unique surface  
626 protein of *Bacillus cereus* required for iron acquisition from heme, hemoglobin and  
627 ferritin. *PLoS Pathog* 2009;5:e1000675. <https://doi.org/10.1371/journal.ppat.1000675>.
- 628 [39] Consentino L, Rejasse A, Crapart N, Bevilacqua C, Nielsen-LeRoux C. Laser capture  
629 microdissection to study *Bacillus cereus* iron homeostasis gene expression during *Galleria*  
630 *mellonella* in vivo gut colonization. *Virulence* 2021;12:2104–21.  
631 <https://doi.org/10.1080/21505594.2021.1959790>.

- 632 [40] Cornelis P, Wei Q, Andrews SC, Vinckx T. Iron homeostasis and management of oxidative  
633 stress response in bacteria. *Metallomics* 2011;3:540–9.  
634 <https://doi.org/10.1039/c1mt00022e>.
- 635 [41] Fu J, Qi L, Hu M, Liu Y, Yu K, Liu Q, et al. Salmonella proteomics under oxidative stress  
636 reveals coordinated regulation of antioxidant defense with iron metabolism and bacterial  
637 virulence. *J Proteomics* 2017;157:52–8. <https://doi.org/10.1016/j.jprot.2017.02.004>.
- 638 [42] Wu M, Shan W, Zhao G-P, Lyu L-D. H<sub>2</sub>O<sub>2</sub> concentration-dependent kinetics of gene  
639 expression: linking the intensity of oxidative stress and mycobacterial physiological  
640 adaptation. *Emerg Microbes Infect* 2022;11:573–84.  
641 <https://doi.org/10.1080/22221751.2022.2034484>.
- 642 [43] Bismuth HD, Brasseur G, Ezraty B, Aussel L. Bacterial Genetic Approach to the Study of  
643 Reactive Oxygen Species Production in *Galleria mellonella* During *Salmonella* Infection.  
644 *Front Cell Infect Microbiol* 2021;11:640112. <https://doi.org/10.3389/fcimb.2021.640112>.
- 645 [44] Nakhleh J, Christophides GK, Osta MA. The serine protease homolog CLIPA14  
646 modulates the intensity of the immune response in the mosquito *Anopheles gambiae*. *J*  
647 *Biol Chem* 2017;292:18217–26. <https://doi.org/10.1074/jbc.M117.797787>.
- 648 [45] Cerenius L, Lee BL, Söderhäll K. The proPO-system: pros and cons for its role in  
649 invertebrate immunity. *Trends Immunol* 2008;29:263–71.  
650 <https://doi.org/10.1016/j.it.2008.02.009>.
- 651 [46] Nappi A, Poirié M, Carton Y. The role of melanization and cytotoxic by-products in the  
652 cellular immune responses of *Drosophila* against parasitic wasps. *Adv Parasitol*  
653 2009;70:99–121. [https://doi.org/10.1016/S0065-308X\(09\)70004-1](https://doi.org/10.1016/S0065-308X(09)70004-1).
- 654 [47] Mols M, Abee T. Primary and secondary oxidative stress in *Bacillus*. *Environ Microbiol*  
655 2011;13:1387–94. <https://doi.org/10.1111/j.1462-2920.2011.02433.x>.
- 656 [48] Zhao L, Zhou Y, Li J, Xia Y, Wang W, Luo X, et al. Transcriptional response of *Bacillus*

657 megaterium FDU301 to PEG200-mediated arid stress. *BMC Microbiol* 2020;20:351.  
658 <https://doi.org/10.1186/s12866-020-02039-4>.

659 [49] Shrivastava AK, Pandey S, Dietz KJ, Singh PK, Singh S, Rai R, et al. Overexpression of  
660 AhpC enhances stress tolerance and N<sub>2</sub>-fixation in *Anabaena* by upregulating stress  
661 responsive genes. *Biochim Biophys Acta* 2016;1860:2576–88.  
662 <https://doi.org/10.1016/j.bbagen.2016.07.031>.

663 [50] Helmann JD. *Bacillus subtilis* extracytoplasmic function (ECF) sigma factors and defense  
664 of the cell envelope. *Curr Opin Microbiol* 2016;30:122–32.  
665 <https://doi.org/10.1016/j.mib.2016.02.002>.

666 [51] Huang X, Decatur A, Sorokin A, Helmann JD. The *Bacillus subtilis* sigma(X) protein is  
667 an extracytoplasmic function sigma factor contributing to survival at high temperature. *J*  
668 *Bacteriol* 1997;179:2915–21. <https://doi.org/10.1128/jb.179.9.2915-2921.1997>.

669 [52] Kamar R, Réjasse A, Jehanno I, Attieh Z, Courtin P, Chapot-Chartier M-P, et al. DltX of  
670 *Bacillus thuringiensis* Is Essential for D-Alanylation of Teichoic Acids and Resistance to  
671 Antimicrobial Response in Insects. *Front Microbiol* 2017;8:1437.  
672 <https://doi.org/10.3389/fmicb.2017.01437>.

673 [53] Attieh Z, Mouawad C, Rejasse A, Jehanno I, Perchat S, Hegna IK, et al. The *fliK* Gene Is  
674 Required for the Resistance of *Bacillus thuringiensis* to Antimicrobial Peptides and  
675 Virulence in *Drosophila melanogaster*. *Front Microbiol* 2020;11:611220.  
676 <https://doi.org/10.3389/fmicb.2020.611220>.

677

678

679

680

681

682 **FIGURE LEGENDS**

683 **Figure 1. Monitoring of the sporulated subpopulation during long-term infection. a.** The  
684 percentage of sporulation was determined daily for 14 days after intrahemocoelic infection of  
685 *G. mellonella* with Bt (pPnprA'gfp<sub>Bte</sub>AAV-PspoIIQ'mCherry) by plating onto LB agar (blue)  
686 or by flow cytometry (purple). 6 larvae were crushed at the time points indicated and serial  
687 dilutions of the homogenate were directly plated onto LB agar for total population numeration,  
688 or after heating at 80°C during 12 minutes to account for heat-resistant spores. For the flow  
689 cytometry assay, the same samples were fixed and red fluorescent events were discriminated in  
690 cytograms (as described in the Materials and Methods) and counted as sporulating bacteria. The  
691 total population was determined by the number of total events. Each symbol represents the data  
692 relative to bacteria extracted from one larva. The data are the result of two independent  
693 experiments and the error bars show the standard deviation from the mean. **b.** Bland-Altman  
694 comparison plot between flow cytometry and plating sporulation assessment. The difference  
695 between plating and flow cytometry is plotted on the Y axis and the average of the values  
696 obtained by both method is plotted on the X axis. The black line represents the bias value (3,198)  
697 and dotted lines indicates the 95% limits of agreement. Data were collected from 27 larvae.

698

699 **Figure 2. Necrotrophism and sporulation promoter activities in bacterial cells during**  
700 **long-term infection.** Flow cytometry analysis of Bt (pPnprA'gfp<sub>Bte</sub>AAV-PspoIIQ'mCherry)  
701 cells during *G. mellonella* infection. Cells were extracted from 6 larvae cadavers at the time  
702 points indicated during 14 days after intrahemocoelic infection. The percentage of the total cell  
703 count represented by each population was discriminated in cytograms and is presented as a  
704 function of time (as described in the Materials and Methods section). Each population  
705 phenotype is associated with a color: Nec<sup>+</sup> in blue for cells expressing the necrotrophic marker,  
706 Spo<sup>+</sup> in pink for cells expressing the sporulation marker, Nec<sup>+</sup>/Spo<sup>+</sup> in purple for cells

707 expressing both markers, ND in black for cells that do not express any of the markers used.  
708 Each symbol represents bacteria extracted from one larva. The data are the result of two  
709 independent experiments and the error bars show the standard deviation from the mean.

710

711 **Figure 3. Assessment of the vitality status of the non-sporulated bacteria during infection.**

712 Flow cytometry analysis of Bt (pP*spoIIQ*'*mCherry*) cells grown in LB medium and harvested  
713 in exponential (OD<sub>600</sub> = 1, dark blue) or stationary phase (OD<sub>600</sub> = 8, light blue), or extracted  
714 from *G. mellonella* cadavers at 1 day (pink), 3 (dark purple) and 7 days (light purple) post-  
715 infection. The samples were incubated for 10 min in the dark at RT with 5 μM 5(6)-CFDA (**a**),  
716 0,5 μM DiBAC4(3) (**b**) and 0.5 μM Sytox Green (**c**) before being subjected to analysis. The  
717 percentage of marked cells among non-sporulating bacteria discriminated in cytograms (as  
718 described in the Materials and Methods section) is presented as a function of time. Unmarked  
719 and heat-shocked bacteria were used as controls. Each symbol represents the data relative to  
720 bacteria extracted from one larva. The data are the result of three independent experiments and  
721 the error bars show the standard deviation from the mean. Statistically significant differences  
722 are indicated by black bars with the p-value obtained after a Kruskal-Wallis Test followed by a  
723 Dunn's multiple comparison test.

724

725 **Figure 4. Induction of *gfp* expression in non-sporulated bacteria during infection.** Flow

726 cytometry analysis of Bt (pP*x*'*gfp*<sub>Bte</sub>-P*spoIIQ*'*mCherry*) cells grown in HCT medium and  
727 harvested in exponential (OD<sub>600</sub> = 1, dark blue) or stationary phase (OD<sub>600</sub> = 6, light blue), or  
728 extracted from *G. mellonella* cadavers at 1 day (pink), 3 (dark purple) and 7 days (light purple)  
729 post-infection. The bacteria were resuspended in conditioned HCT medium supplemented with  
730 25 mM xylose. Aliquots were analyzed at the time of inoculation and 1 and 2 h after the start  
731 of the induction. Green-fluorescent cells among the non-sporulating bacteria were

732 discriminated in cytograms as described in the Materials and Methods section. Each symbol  
733 represents the data relative to bacteria extracted from one larva. The data are the result of three  
734 independent experiments and the error bars show the standard deviation from the mean.  
735 Statistically significant differences are indicated by black bars with the p-value obtained after  
736 a Kruskal-Wallis Test followed by a Dunn's multiple comparison test.

737

738 **Figure 5. Recovery assessment of the bacteria extracted from insect cadavers. a.** Colony  
739 size analysis of Bt (*pPspoIIQ'mCherry*) cells grown in LB medium and harvested in  
740 exponential ( $OD_{600} = 1$ , dark blue) or stationary phase ( $OD_{600} = 8$ , light blue), or extracted  
741 from *G. mellonella* cadavers at 1 day (pink), 3 (dark purple) and 7 days (light purple) post-  
742 infection, or of an *in vitro* spore preparation in LB medium (grey). The upper panels show  
743 colonies photographed under a binocular stereo microscope (see details in the Materials and  
744 Methods section), 16 hours post-planting on LB agar. The scale bar represents 1 mm. Colony  
745 size was then measured using ImageJ as described in the Materials and Methods section. At  
746 least 145 cells were measured for each condition. Each symbol on the lower graph represents  
747 one colony. The data are the results of three independent experiments and the black horizontal  
748 bars indicate the mean. Statistically significant differences are indicated by black bars with the  
749 p-value obtained after a Kruskal-Wallis Test followed by a Dunn's multiple comparison test. **b.**  
750 Time-lapse microscopy analysis performed on bacteria spotted onto LB agarose pads. One  
751 picture was taken per hour, during 5 hours. Each non-sporulating cell was affected to each of  
752 the listed categories and the percentage of cells for each category was calculated. The data are  
753 the result of three independent experiments. At least 145 cells were counted and the error bars  
754 show the standard deviation from the mean. Statistically significant differences are indicated  
755 by black bars with the p-value obtained after a Kruskal-Wallis Test followed by a Dunn's  
756 multiple comparison test. **c.** Time-lapse microscopy pictures with the time scale represented

757 above each picture. Bacteria were false colored in pink for Spo<sup>+</sup> cells. Arrows point to  
758 representative bacteria of the categories listed in b. The scale bar represents 10 μm. These  
759 results are representative of three independent experiments. **d.** Growth recovery on Insect agar  
760 medium. The bacteria were spotted onto Insect agar (filled bars) or LB agar plates (open bars).  
761 The bacteria were incubated at RT and CFU were numerated the next day of plating on the latter  
762 and 3 days later on the former. Each symbol represents bacteria extracted from one larva or  
763 originating from one culture. The percentage of CFU counted on LB versus Insect agar is  
764 indicated below each cell type. The data are the result of four independent experiments and the  
765 error bars show the standard deviation from the mean.

766

767 **Figure 6. Transcriptomic analysis of bacterial cells extracted from insect cadavers at 7**  
768 **days post-infection. a.** Principal component analysis plot of the different samples: exponential  
769 growth phase cells (dark blue), stationary growth phase cells (light blue), cells extracted from  
770 insect cadavers at 7 dpi (purple). Samples were plotted against the first two principal  
771 components calculated from the gene expression values. The axes labels indicate percentage of  
772 total variance that is explained by each component. **b.** Venn diagrams indicating the number of  
773 up-regulated and down-regulated genes in cells extracted from insect cadavers at 7 dpi  
774 compared to exponential growth phase cells (purple) or stationary growth phase cells (light  
775 blue) and in stationary growth phase cells compared to exponential growth phase cells (dark  
776 blue). The genes taken into account present a  $\log_2FC \leq -2$  or  $\log_2FC \geq 2$  and an adjusted p-  
777 value  $\leq 0,01$ . **c.** COG analysis of genes expressed in cells extracted from insect cadavers at 7 dpi  
778 compared to exponential growth phase cells and stationary growth phase cells. Blue bars  
779 indicate up-regulated genes with a  $\log_2FC \geq 2$ , purple bars indicate down-regulated genes with  
780 a  $\log_2FC \leq -2$ . The considered genes have an adjusted p-value  $\leq 0,01$ . Genes with unknown  
781 functions are not represented. **d.** Heatmaps of genes expressed in cells extracted from insect



782 cadavers at 7 dpi compared to exponential growth phase cells (left column), stationary growth  
783 phase cells (mid column) or in bacteria harvested in stationary growth phase compared to  
784 exponential growth phase (right column). Selected categories of differentially expressed genes  
785 are shown: oxidative stress, iron homeostasis, DNA replication recombination and repair as  
786 well as cell motility. Purple indicates low expression ( $\log_2FC \leq -2$ ) and blue indicates high  
787 expression ( $\log_2FC \geq 2$ ). ns indicates an adjusted p-value  $> 0,01$ .

788

789 **Figure 7. Iron homeostasis and oxidative stress resistance promoter activities during**  
790 **infection.** Flow cytometry analysis of Bt (pPykuN2'*gfp<sub>Bte</sub>AAV-PspoIIQ'mCherry*) (a), Bt  
791 (pPisdE1'*gfp<sub>Bte</sub>AAV-PspoIIQ'mCherry*) (b), Bt (pPdhbA'*gfp<sub>Bte</sub>AAV-PspoIIQ'mCherry*) (c), Bt  
792 (pPBTB\_c10430'*gfp<sub>Bte</sub>AAV-PspoIIQ'mCherry*) (d), Bt (pPkatE1'*gfp<sub>Bte</sub>AAV-PspoIIQ'mCherry*)  
793 (e) and Bt (pPsodA1'*gfp<sub>Bte</sub>AAV-PspoIIQ'mCherry*) (f) cells grown in LB medium and harvested  
794 in exponential ( $OD_{600} = 1$ , dark blue) or stationary phase ( $OD_{600} = 8$ , light blue), or extracted  
795 from *G. mellonella* cadavers at 1 day (pink), 3 (dark purple) and 7 days (light purple) pi. Green  
796 fluorescent cells among the non-sporulating bacteria were discriminated in cytograms as  
797 described in the Materials and Methods section. Each symbol represents the data relative to  
798 bacteria extracted from one larva. The data are the result of two independent experiments and  
799 the error bars show the standard deviation from the mean. Statistically significant differences  
800 are indicated by black bars with the p-value obtained after a Kruskal-Wallis Test followed by a  
801 Dunn's multiple comparison test.

802

803

804

805

806

807 **FIGURES**

808 Figure 1

809

810

811

812

813

814

815

816

817

818

819

820

821

822

823

824

825

826

827

828

829

830

831

832

833

834

835

836

837

838

839

840

841

842

843

844

845

846

847

848

849

850

851

852

853

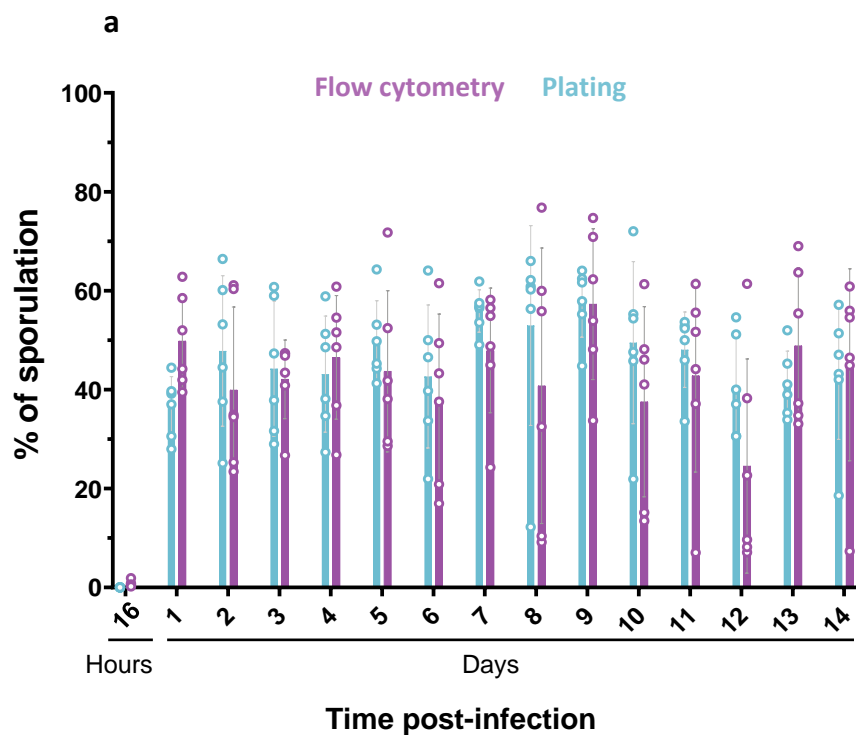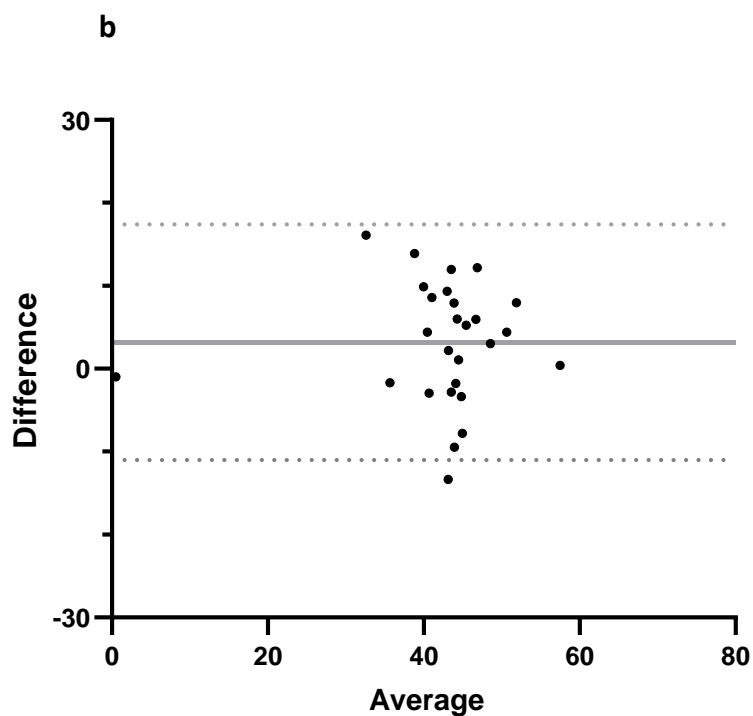

854 Figure 2

855  
856  
857  
858  
859  
860  
861  
862  
863  
864  
865  
866  
867  
868  
869  
870  
871  
872  
873  
874  
875  
876  
877  
878  
879  
880  
881  
882  
883  
884  
885  
886  
887  
888  
889  
890  
891  
892  
893  
894  
895  
896  
897  
898  
899  
900  
901  
902  
903

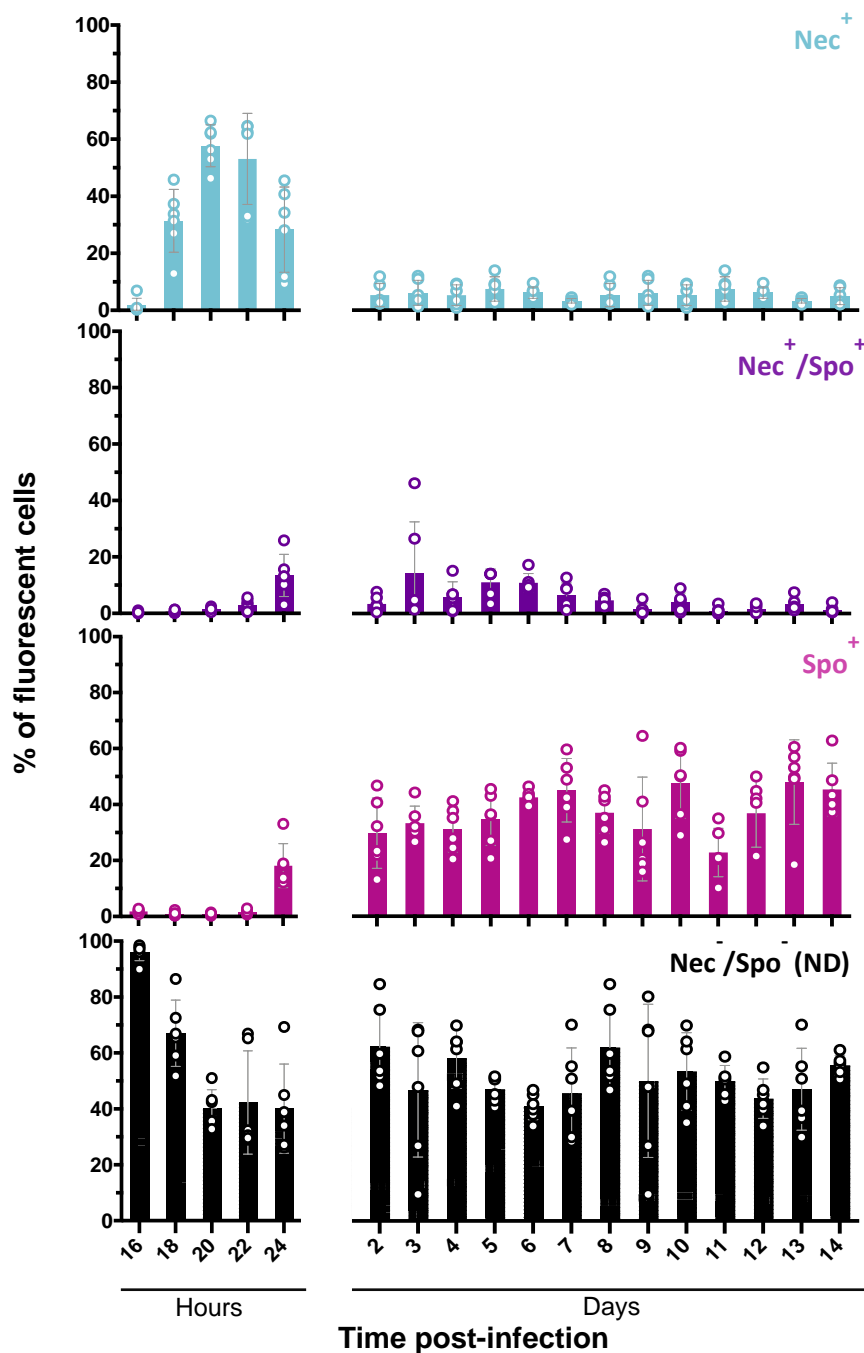

904 Figure 3

905  
906  
907  
908  
909  
910  
911  
912  
913  
914  
915  
916  
917  
918  
919  
920  
921  
922  
923  
924  
925  
926  
927  
928  
929  
930  
931  
932  
933  
934  
935  
936  
937  
938  
939  
940  
941  
942  
943  
944  
945  
946  
947  
948  
949  
950  
951  
952  
953

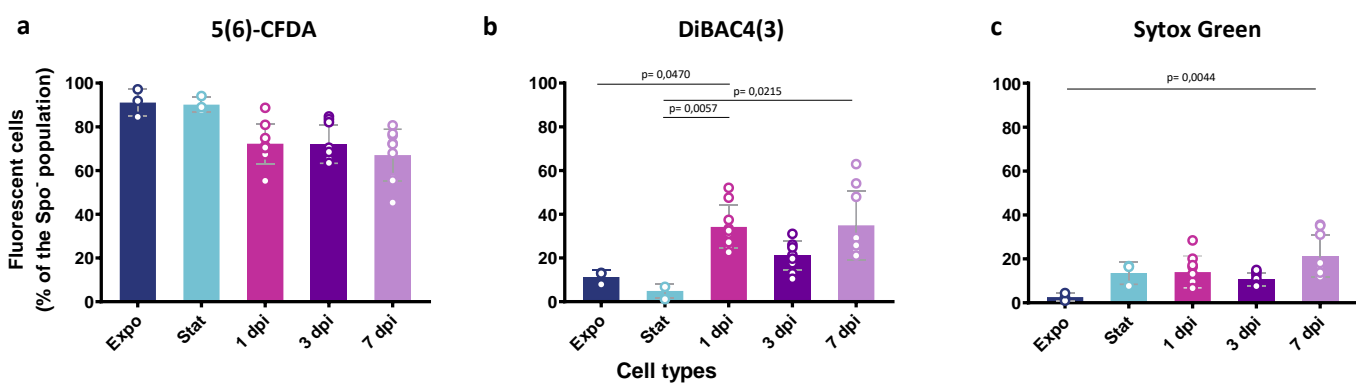

954 Figure 4

955  
956  
957  
958  
959  
960  
961  
962  
963  
964  
965  
966  
967  
968  
969  
970  
971  
972  
973  
974  
975  
976  
977  
978  
979  
980  
981  
982  
983  
984  
985  
986  
987  
988  
989  
990  
991  
992  
993  
994  
995  
996  
997  
998  
999  
1000  
1001  
1002  
1003

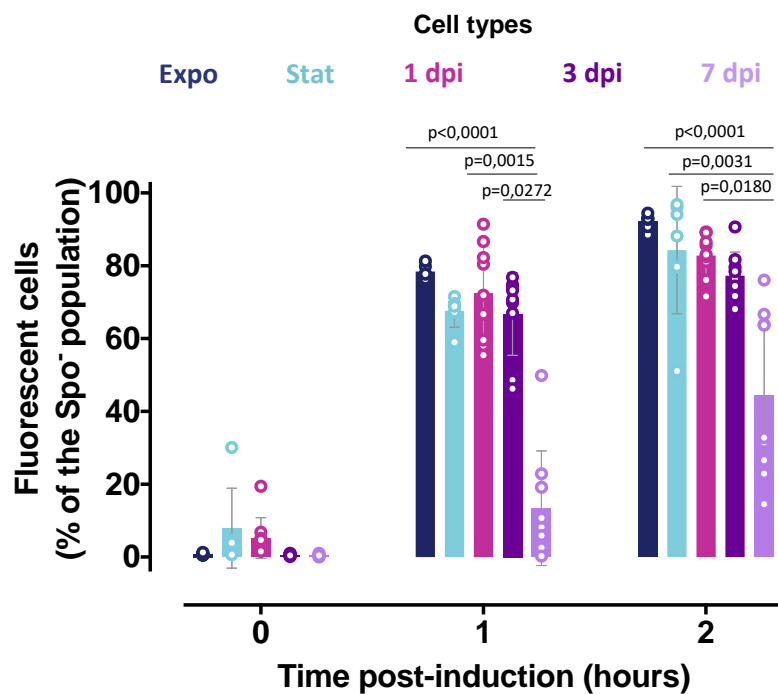

1004 Figure 5

1005  
1006  
1007  
1008  
1009  
1010  
1011  
1012  
1013  
1014  
1015  
1016  
1017  
1018  
1019  
1020  
1021  
1022  
1023  
1024  
1025  
1026  
1027  
1028  
1029  
1030  
1031  
1032  
1033  
1034  
1035  
1036  
1037  
1038  
1039  
1040  
1041  
1042  
1043  
1044  
1045  
1046  
1047  
1048  
1049  
1050  
1051  
1052  
1053

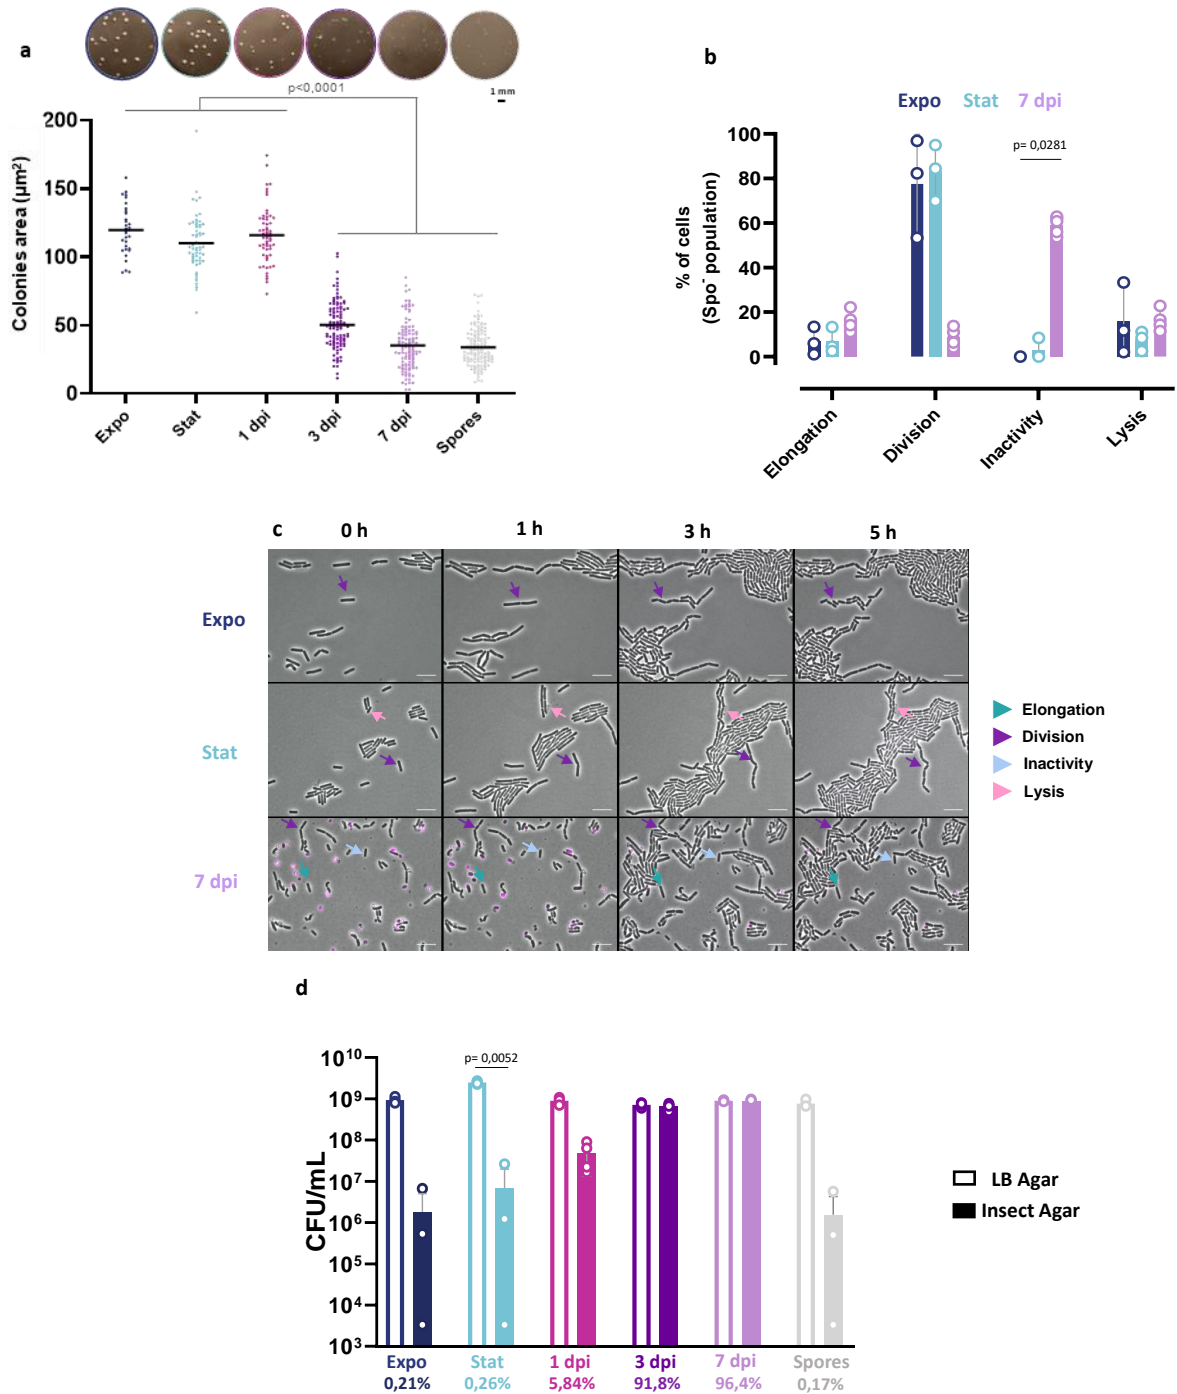

1054 Figure 6

1055  
1056  
1057  
1058  
1059  
1060  
1061  
1062  
1063  
1064  
1065  
1066  
1067  
1068  
1069  
1070  
1071  
1072  
1073  
1074  
1075  
1076  
1077  
1078  
1079  
1080  
1081  
1082  
1083  
1084  
1085  
1086  
1087  
1088  
1089  
1090  
1091  
1092  
1093  
1094  
1095  
1096  
1097  
1098  
1099  
1100  
1101  
1102  
1103

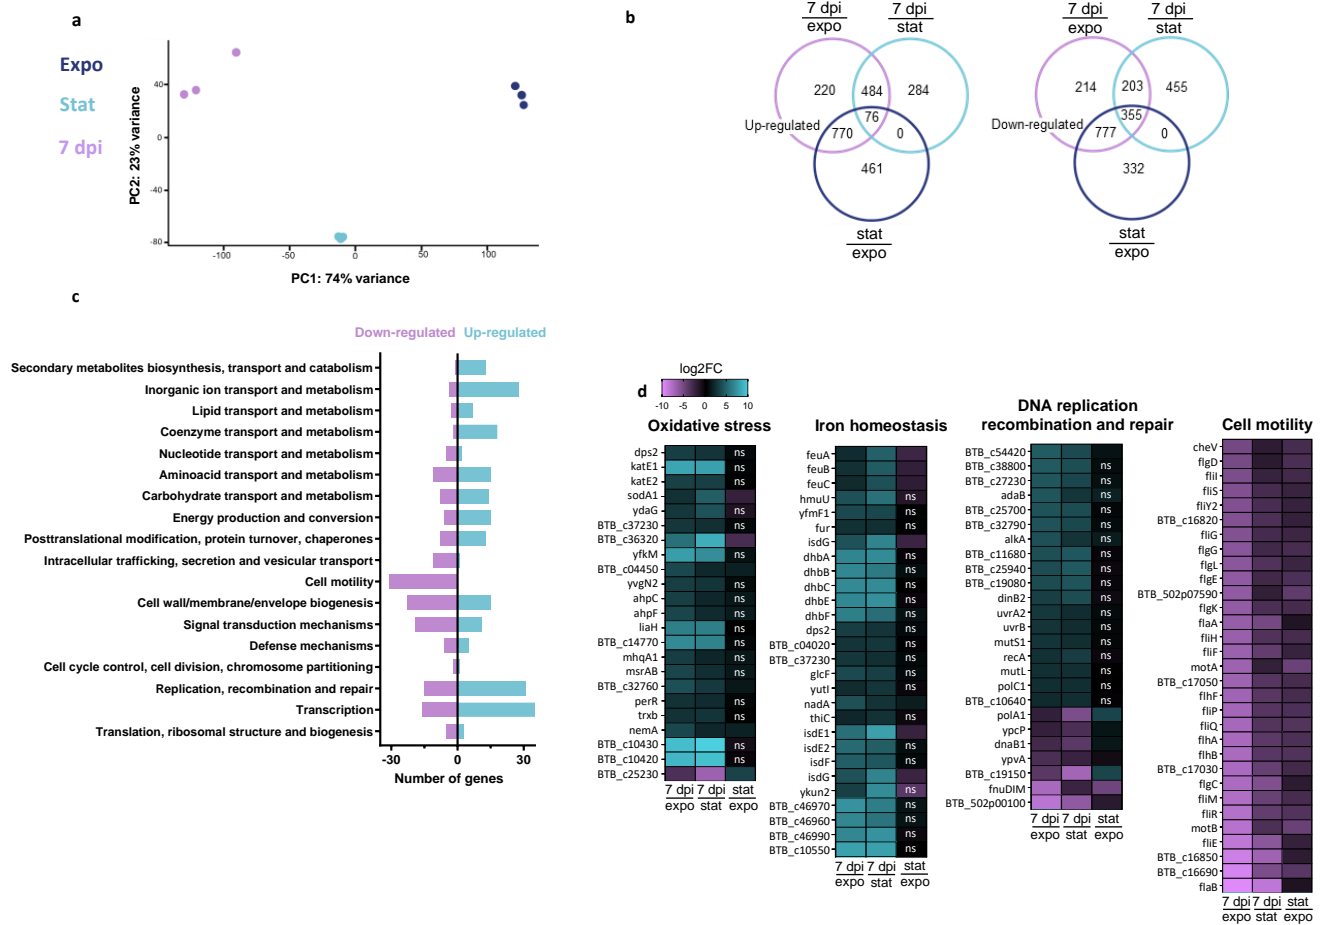

1104 Figure 7

1105  
1106  
1107  
1108  
1109  
1110  
1111  
1112  
1113  
1114  
1115  
1116  
1117  
1118  
1119  
1120  
1121  
1122  
1123  
1124  
1125  
1126  
1127  
1128

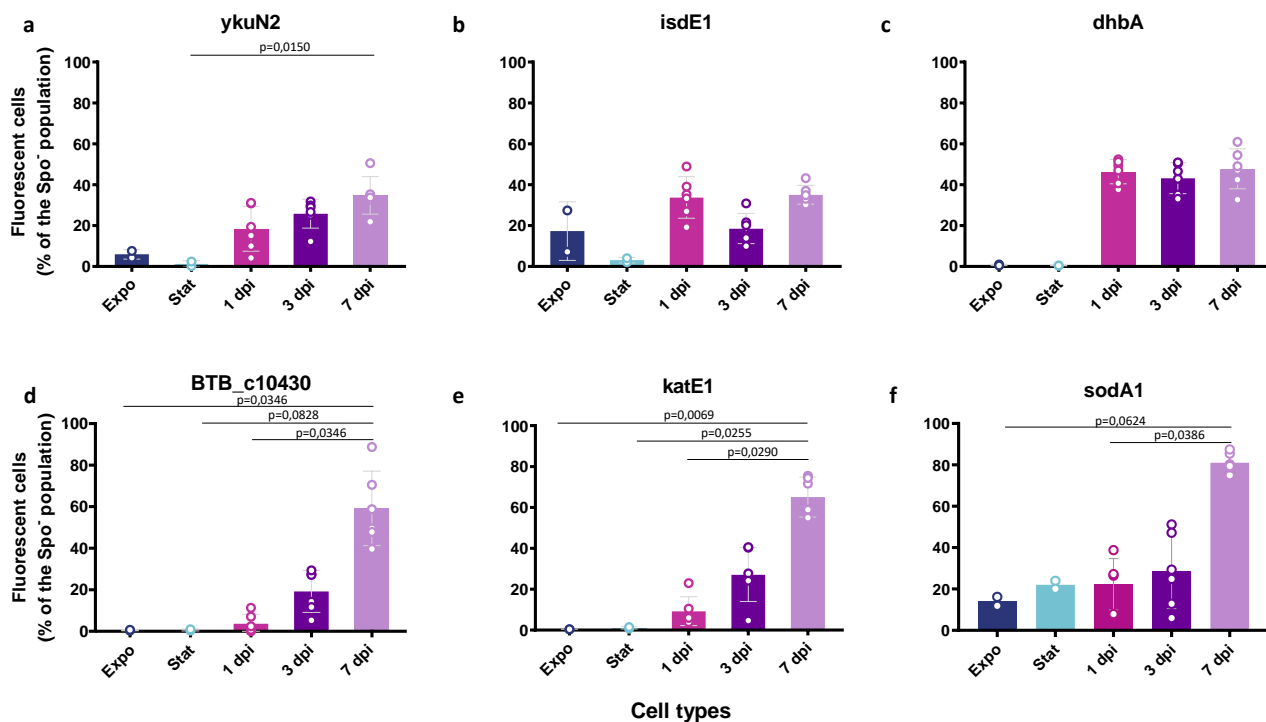

Source: https://www.biorxiv.org/content/10.1101/2022.05.09.491210v2.full.pdf
